# Supplementary material for: PET Imaging of Fructose Metabolism in a Rodent Model of Neuroinflammation with 6-[18F]fluoro-6-deoxy-D-fructose
Source: MDPI journal article supplement (doi:10.3390/molecules27238529), 2022-12-03
Supplement: s1 [file s1]

## Supplementary Materials

# PET imaging of fructose metabolism in a rodent model of neuroinflammation with 6- $^{18}\text{F}$ fluoro-6-deoxy-D-fructose.

Amanda J. Boyle<sup>1,2\*</sup>, Emily Murrell<sup>1</sup>, Junchao Tong<sup>1</sup>, Christin Schifani<sup>1</sup>, Andrea Narvaez<sup>1</sup>, Melinda Wuest<sup>3</sup>, Frederick West<sup>3,4</sup>, Frank Wuest<sup>3,4</sup>, and Neil Vasdev<sup>1,2\*</sup>

<sup>1</sup> Azrieli Centre for Neuro-Radiochemistry, Brain Health Imaging Centre, Centre for Addiction and Mental Health, 250 College St, Toronto, M5T 1R8, ON., Canada

<sup>2</sup> Department of Psychiatry, University of Toronto, 27 King's College Circle, Toronto, M5T-1R8, ON., Canada

<sup>3</sup> Department of Chemistry, University of Alberta, Edmonton, T6G-2N4, Alberta, Canada

<sup>4</sup> Department of Oncology, University of Alberta, Edmonton, T6G-1Z2, Alberta, Canada

\*Correspondence: amy.boyle@camh.ca, neil.vasdev@utoronto.ca Tel.: 416-535-8501 ext. 30884 (A.J. B.); 416-535-8501 ext. 30988 (N.V.)

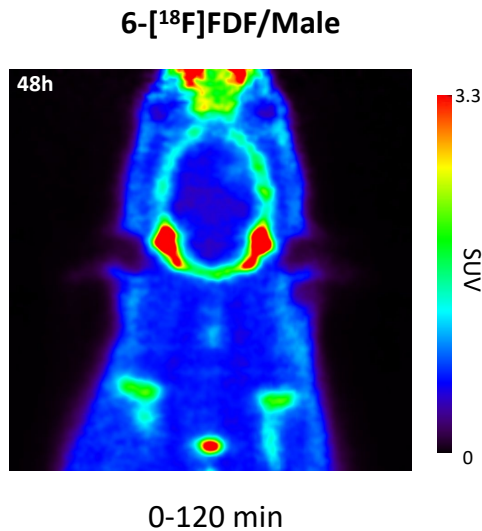

**Figure S1.** Unstripped static 6- $^{18}\text{F}$ FDF image of **Figure 1A** (48 h post-LPS injection in a male rat), showing radioactivity accumulation in the skull; but also increased uptake in the LPS-injected right striatum *vs.* the left side.

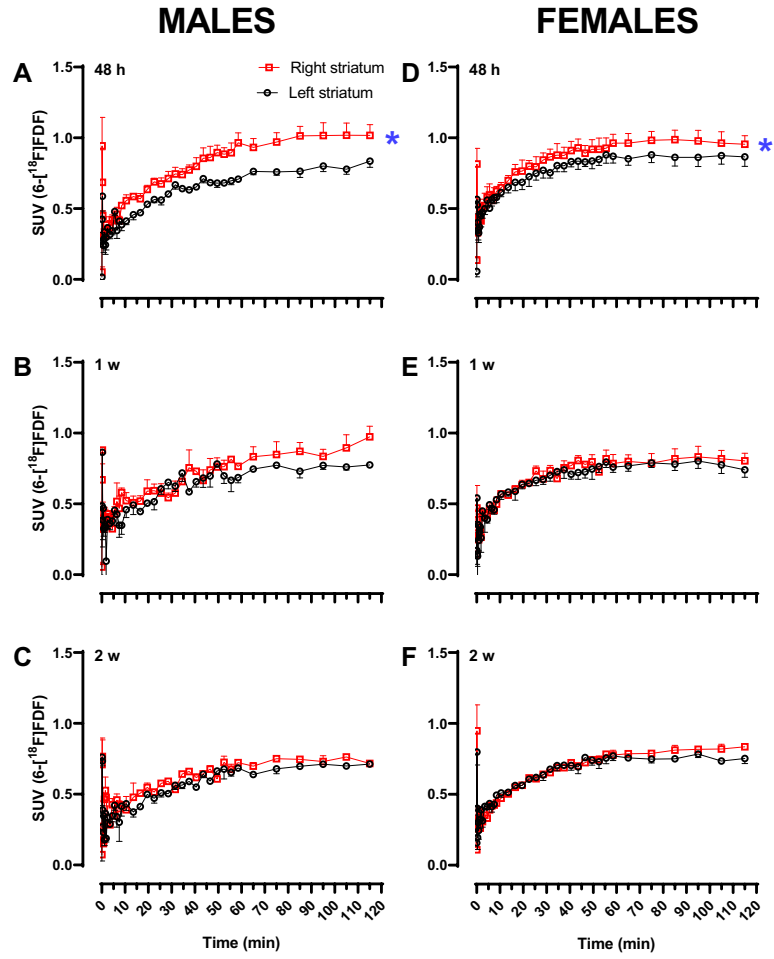

**Figure S2.** TACs of 6-[ $^{18}\text{F}$ ]FDF in striatum of male and female rats injected unilaterally with LPS in the right striatum. Average TACs ( $\pm$ SEM) of 6-[ $^{18}\text{F}$ ]FDF are shown in the right and left striatum of male (A-C) rats at 48 hours (n=4), 1 week (n=2), and 2 weeks (n=2), respectively, post-LPS injection and of female rats (D-F) at 48 hours (n=3), 1 week (n=3), and 2 weeks (n=3), respectively, post-LPS injection. \* $P < 0.05$ , right vs left striatum at 48 hours (repeated measures ANOVA).

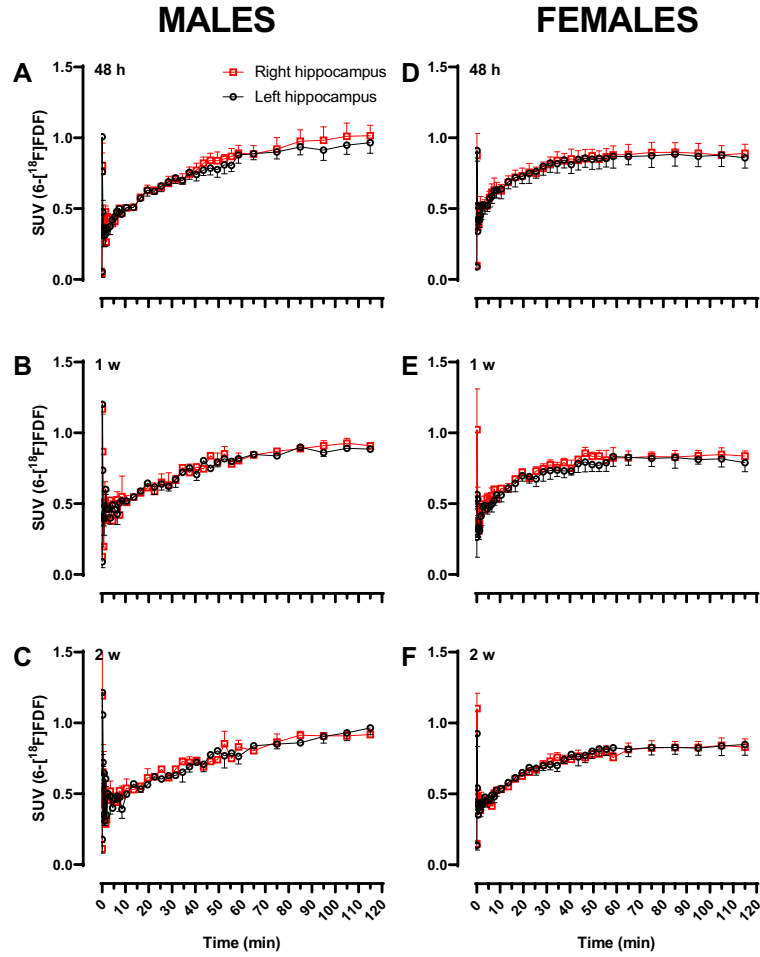

**Figure S3.** TACs of 6-[<sup>18</sup>F]FDF in hippocampus of male and female rats injected unilaterally with LPS in the right striatum. Average TACs ( $\pm$ SEM) of 6-[<sup>18</sup>F]FDF are shown in the right and left hippocampus of male (A-C) rats at 48 hours (n=4), 1 week (n=2), and 2 weeks (n=2), respectively, post-LPS injection and of female rats (D-F) at 48 hours (n=3), 1 week (n=3), and 2 weeks (n=3), respectively, post-LPS injection.

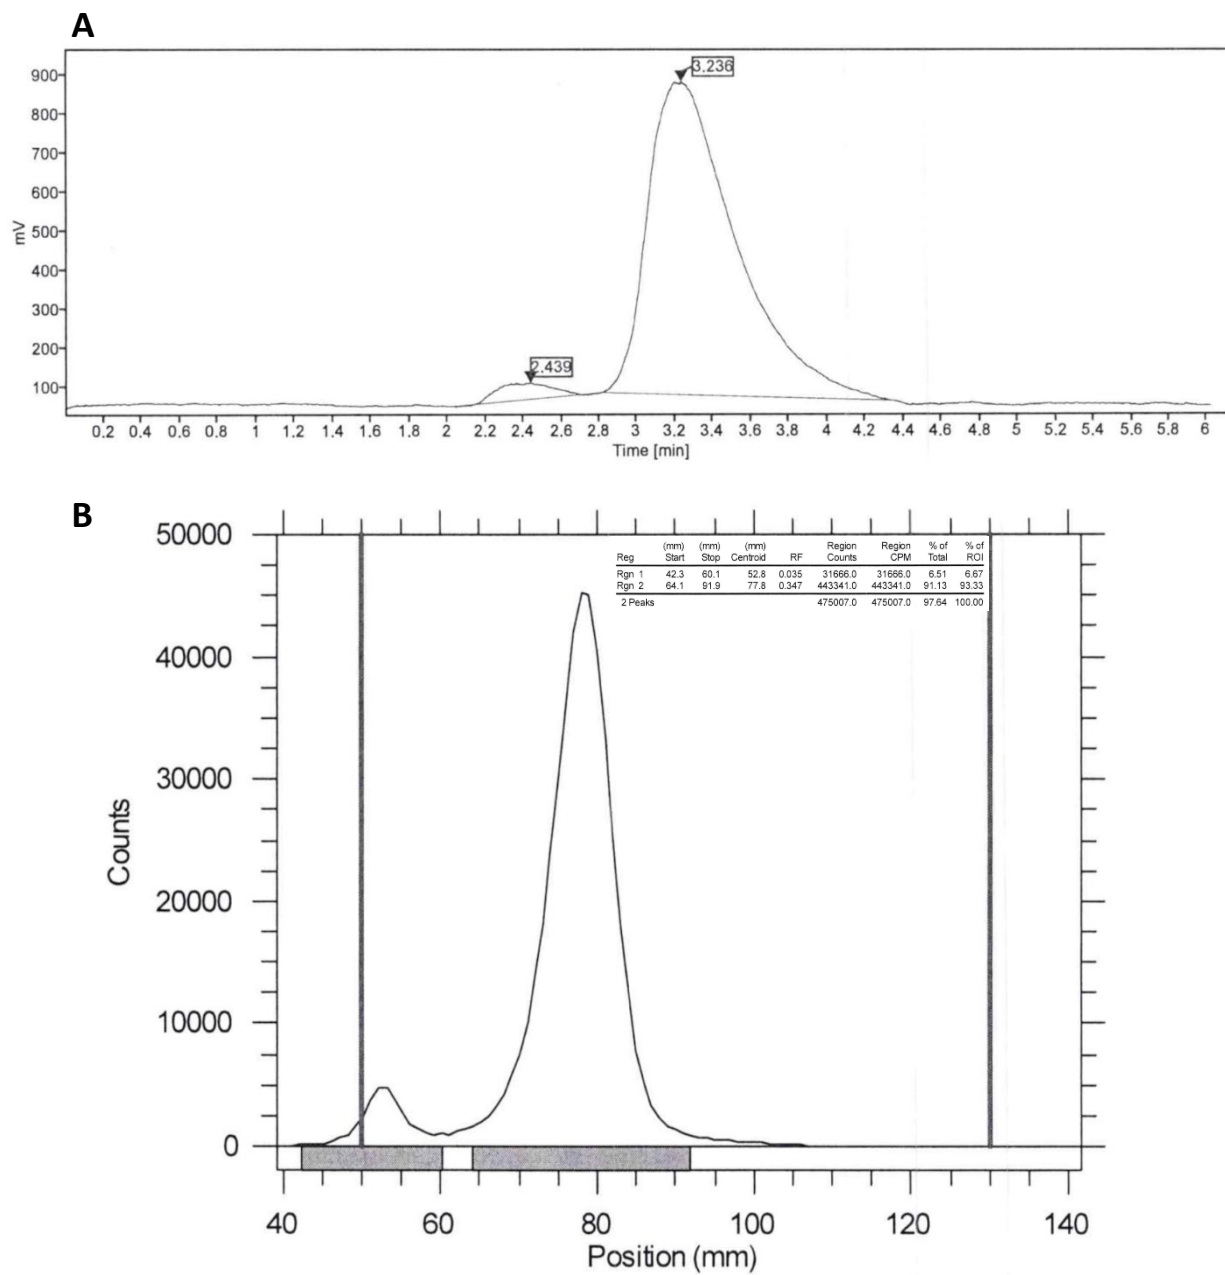

**Figure S4.** Results of quality control of a 6-[ $^{18}\text{F}$ ]FDF production with residual [ $^{18}\text{F}$ ]fluoride. (A) Radio-HPLC chromatogram shows 6-[ $^{18}\text{F}$ ]FDF at 3.2 min and residual [ $^{18}\text{F}$ ]fluoride at 2.4 min; (B) Radio-TLC also shows 6-[ $^{18}\text{F}$ ]FDF (93.3%) at 78 mm and residual [ $^{18}\text{F}$ ]fluoride (6.7%) at 53 mm.
